# Supplementary material for: Rab GTPases in Osteoclastic Endomembrane Systems
Source: Hindawi journal article supplement (doi:10.1155/2018/4541538), 2018-08-15
Supplement: f1 [file 4541538.f1.pdf]

Supplemental Table: *GTPases expressed in osteoclasts: Summary of their regulators, effectors and functions as identified in other cell types*

| GTPase in OC                                                                                                  | TBC/RabGAP                                                                                                                                | RabGEF                                                                                                                                                                                                                                                               | Effector protein                                                                                                                                                                                                                                                                                                                                                                              | Primary trafficking function<br>26, 29, 33               | Other trafficking function                                                                                                        |
|---------------------------------------------------------------------------------------------------------------|-------------------------------------------------------------------------------------------------------------------------------------------|----------------------------------------------------------------------------------------------------------------------------------------------------------------------------------------------------------------------------------------------------------------------|-----------------------------------------------------------------------------------------------------------------------------------------------------------------------------------------------------------------------------------------------------------------------------------------------------------------------------------------------------------------------------------------------|----------------------------------------------------------|-----------------------------------------------------------------------------------------------------------------------------------|
| Rab1B <sup>14, 26, 72</sup>                                                                                   | TBC1D14 <sup>63</sup> , TBC1D20 <sup>37, 38, 55</sup> ; USP6NL <sup>38</sup>                                                              | TRAPPI subunits (TRAPPC1, TRAPPC2, TRAPP2L, TRAPPC3, TRAPPC4, TRAPPC5, TRAPPC5A/B) <sup>35</sup> ; TRAPPIII subunit TRAPPC8 <sup>63</sup> ; DrrA <sup>24</sup>                                                                                                       | Golgin84 <sup>63</sup> ; p115 <sup>22, 29, 46</sup> ; GM130 <sup>29</sup>                                                                                                                                                                                                                                                                                                                     | ER to Golgi trafficking                                  | Autophagy <sup>46, 57</sup>                                                                                                       |
| Rab2B <sup>75</sup>                                                                                           | TBC1D11 <sup>37, 38</sup> ; TBC1D20 <sup>37, 38</sup> ; USP6NL <sup>38</sup>                                                              | NI                                                                                                                                                                                                                                                                   | Bicaudal-D <sup>34,43</sup> ; GM130/p115 <sup>43</sup> ; HOPS complex (subunit Vps39) <sup>43</sup> ; golgin-45 <sup>43</sup>                                                                                                                                                                                                                                                                 | ER to Golgi trafficking                                  | NI                                                                                                                                |
| Rab3 <sup>26</sup> A <sup>72, 67</sup> /B <sup>72, 73</sup> /C <sup>31, 73</sup> /D <sup>14, 32, 74, 75</sup> | TBC1D10B (A) <sup>37, 38</sup> ; USP6NL (A) <sup>38</sup> ; RAB3GAP* <sup>34</sup> (A) <sup>118</sup>                                     | MADD <sup>35</sup> ; Rab3GEP <sup>118</sup> ; GRAB <sup>35, 118</sup>                                                                                                                                                                                                | Rabphilin3 <sup>22, 34</sup> ; Noc2 <sup>22</sup> ; RIM1 <sup>22</sup> ; RIM2 <sup>22</sup> ; SNAP29 (A) <sup>56</sup>                                                                                                                                                                                                                                                                        | Exocytosis; Golgi to apical membrane trafficking         | Secretory granules <sup>74</sup> ; <u>Bone resorption (D)</u> <sup>31, 32, 74, 75</sup>                                           |
| Rab4A <sup>31</sup> /B <sup>14, 25, 72</sup>                                                                  | TBC1D11 <sup>37, 38</sup> ; RUTBC3 <sup>118</sup> ; EVI5L (A) <sup>38</sup>                                                               | NI                                                                                                                                                                                                                                                                   | Rabaptin4 <sup>22</sup> ; Rabaptin5 <sup>22, 33</sup> ; Rabip4 <sup>43</sup> ; Rabaptin5β <sup>22</sup> ; GARP complex (Vps51, Vps52, Vps53) <sup>43</sup> ; Rabenosyn5 <sup>34</sup>                                                                                                                                                                                                         | Early/recycling endocytosis                              | Autophagy <sup>55, 57</sup>                                                                                                       |
| Rab5A <sup>31</sup> /B <sup>31</sup> /C <sup>14, 26, 72</sup>                                                 | TBC1D3 <sup>37, 38, 118</sup> ; RUTBC3 <sup>118</sup> (A-C) <sup>37, 38</sup> ; USP6NL <sup>37, 118</sup> (A) <sup>38</sup>               | RIN1 <sup>35, 55, 118</sup> ; RIN2 <sup>35, 55, 118</sup> ; <u>RIN3</u> <sup>35, 39, 55, 118</sup> ; RINL <sup>35</sup> ; ALS2 <sup>35, 55, 118</sup> ; ALS2CL <sup>35, 55</sup> ; Rabex5 <sup>29, 34, 55, 118</sup> ; Vsp9 <sup>55</sup> ; GAPVD1 <sup>35, 55</sup> | HOPS complex <sup>34</sup> ; Rabenosyn5 <sup>22, 43</sup> ; <u>EAA1</u> <sup>29, 72</sup> ; p150 <sup>22</sup> ; Vac1 <sup>22, 55</sup> ; PI3K <sup>22</sup> ; Vps34 <sup>43, 55</sup> ; Vps45 <sup>22</sup> ; CORVET <sup>22, 55</sup> ; Rabaptin5 <sup>29, 34, 43</sup> ; huntingtin <sup>43</sup> ; Kif13A <sup>43</sup> ; Ccz1 <sup>43</sup> ; TBC1D15 <sup>43</sup> ; APPL <sup>29</sup> | Early endocytosis                                        | Autophagy <sup>46, 55, 57, 64</sup> ; Macropinocytosis <sup>38</sup>                                                              |
| Rab6 <sup>26, 75</sup>                                                                                        | TBC1D11 <sup>37, 38, 118</sup>                                                                                                            | RIC1-RGP1 <sup>29, 35</sup>                                                                                                                                                                                                                                          | Rabkinesin6 <sup>22</sup> ; GAPCenA <sup>22</sup> ; OCRL1 <sup>43</sup> ; TMF1 <sup>43</sup> ; EVI5 <sup>43</sup> ; TRAPPI <sup>43</sup> ; DENND5 <sup>43</sup> (A) <sup>34</sup> ; TBC1D5 <sup>43</sup> ; Bicaudal-D <sup>34, 43, 56</sup>                                                                                                                                                   | Intra-Golgi trafficking                                  | NI                                                                                                                                |
| Rab7 <sup>15, 31, 72, 75, 84, 89, 90, 91</sup>                                                                | TBC1D2 <sup>37, 38, 85</sup> ; TBC1D5 <sup>37</sup> ; TBC1D15 <sup>37, 38, 55, 118</sup> ; RUTBC3 <sup>118</sup> ; EVI5L <sup>38</sup>    | Mon1-Ccz1 <sup>23, 24, 29, 35, 55</sup> ; Vsp39 <sup>23</sup> ; HOPS complex <sup>34</sup>                                                                                                                                                                           | RILP <sup>55, 23, 84, 90</sup> ;ORP1L <sup>23, 55</sup> ; Rabring7 <sup>22, 90</sup> ; <u>Rac1</u> <sup>90, 92</sup> ; <u>PLEKHM1</u> <sup>84, 91</sup> ; HOPS complex <sup>22, 23</sup> (subunit Vps39, Vps41) <sup>29</sup> ; FYCO1 <sup>23, 46, 55</sup> PLEKHF1 (Phafin1) <sup>55</sup> ; VAMP8 <sup>55</sup> ; Rubicon <sup>43</sup>                                                     | Late endocytosis                                         | Autophagy <sup>46, 55, 56</sup> ; <u>Bone resorption</u> <sup>23, 31, 32, 90, 91, 92</sup>                                        |
| Rab8B <sup>31</sup>                                                                                           | TBC1D1 <sup>38</sup> ; TBC1D17 <sup>55</sup>                                                                                              | RABIN8 <sup>24, 35, 55, 118</sup> ; RPGR <sup>35</sup> ; GRAB <sup>35</sup>                                                                                                                                                                                          | Rab8IP <sup>22</sup> ; <u>TBK1</u> <sup>46, 55</sup> ; Sec15 <sup>35</sup>                                                                                                                                                                                                                                                                                                                    | Golgi to basolateral membrane trafficking                | Xenophagy <sup>46, 55, 57</sup> ; Wnt/β-catenin signaling <sup>46</sup>                                                           |
| Rab9 <sup>14, 26, 72</sup> A <sup>31</sup>                                                                    | NI                                                                                                                                        | DENND2A <sup>31, 55</sup> ; DENND2B <sup>35</sup> ; DENND2C <sup>35</sup> ; DENND2D <sup>35</sup>                                                                                                                                                                    | HSP4 <sup>35</sup> ; <u>p40</u> <sup>22</sup> (A) <sup>29</sup> ; TIP47 <sup>22</sup> (A) <sup>29</sup> ; RUTBC1 <sup>29, 34</sup> ; GM130 <sup>43</sup> ; RUBTBC2 <sup>29, 34</sup>                                                                                                                                                                                                          | Late endocytosis to <i>trans</i> Golgi                   | Xenophagy <sup>46, 55</sup> ; Cholesterol trafficking <sup>30</sup>                                                               |
| Rab10 <sup>26, 31, 75</sup>                                                                                   | TBC1D1 <sup>38</sup> ; TBC1D4 <sup>37, 38</sup> ; RUTBC3 <sup>118</sup> ; EVI5L <sup>38, 118</sup> ; RAB3GAP* <sup>118</sup>              | DENND4A <sup>35</sup> ; DENND4B/C <sup>35</sup>                                                                                                                                                                                                                      | EVI5 <sup>37</sup> ; EVI5L <sup>37</sup>                                                                                                                                                                                                                                                                                                                                                      | Golgi to basolateral membrane trafficking                | NI                                                                                                                                |
| Rab11 <sup>15, 75</sup> A <sup>31</sup> /B <sup>14, 26, 72</sup>                                              | TBC1D11 <sup>37, 38</sup> ; TBC1D15 <sup>38</sup> (A) <sup>37</sup> ; EVI5 <sup>37, 38, 55</sup>                                          | TRAPPC2 <sup>55</sup> ; HTT complex <sup>55</sup> ; REI1 <sup>35</sup>                                                                                                                                                                                               | TBC1D14 <sup>46, 55, 63</sup> ; Myosin Vb (A) <sup>34</sup> ; Rabin8 <sup>35</sup> ; Rabiphilin11 <sup>22</sup> ; Rab11BP <sup>22</sup> ; FIP2 <sup>22</sup> ; FIP3 <sup>22</sup> ; FIP4 <sup>22</sup> ; Sec15 <sup>22, 35</sup> ; RIP11 <sup>22</sup> ; PI4KIIIβ (A) <sup>34</sup>                                                                                                           | Recycling endocytosis                                    | Autophagy <sup>46, 55, 57, 64</sup>                                                                                               |
| Rab12 <sup>31</sup>                                                                                           | NI                                                                                                                                        | DENND3 <sup>35, 42</sup>                                                                                                                                                                                                                                             | RILPL1 <sup>35, 42</sup>                                                                                                                                                                                                                                                                                                                                                                      | Vesicles transport from peripheral to perinuclear region | Autophagy <sup>64</sup>                                                                                                           |
| Rab13 <sup>31, 32</sup>                                                                                       | <u>TBC1D25</u> <sup>38, 40</sup>                                                                                                          | DENND1C <sup>35</sup> ; DENND2B <sup>35</sup>                                                                                                                                                                                                                        | MICAL-L2 <sup>35</sup> ; Delta-PDE <sup>22</sup>                                                                                                                                                                                                                                                                                                                                              | NI                                                       | Tight junctions assembly <sup>31</sup> ; Traffic of glucose transporters <sup>31</sup> ; Neuron regeneration <sup>31</sup>        |
| Rab14 <sup>31, 75</sup>                                                                                       | TBC1D1 <sup>38</sup> ; TBC1D4 <sup>37, 38</sup>                                                                                           | DENND6A/B <sup>35</sup> ; FAM116A <sup>29</sup>                                                                                                                                                                                                                      | NI                                                                                                                                                                                                                                                                                                                                                                                            | Transport between endocytosis and Golgi                  | NI                                                                                                                                |
| Rab18 <sup>31, 75</sup>                                                                                       | NI                                                                                                                                        | RAB3GAP1-RAB3GAP2 <sup>35, 43, 65</sup>                                                                                                                                                                                                                              | Syntaxin-18 <sup>43</sup> ; TBC1D5 <sup>43</sup> ; LRRK2 <sup>43</sup> ; Spartin <sup>43</sup> ; NRZ complex <sup>43</sup>                                                                                                                                                                                                                                                                    | ER to Golgi trafficking                                  | Autophagy <sup>64</sup> ; Virus infection <sup>65</sup> ; Lipid droplets metabolism <sup>43, 65</sup>                             |
| Rab20 <sup>31</sup>                                                                                           | NI                                                                                                                                        | NI                                                                                                                                                                                                                                                                   | NI                                                                                                                                                                                                                                                                                                                                                                                            | Recycling/apical endocytosis                             | Vacuolar H <sup>+</sup> ATPase trafficking <sup>30</sup>                                                                          |
| Rab21 <sup>31</sup>                                                                                           | TBC1D17 <sup>37, 38</sup>                                                                                                                 | MTMR13 <sup>70</sup> ; Rabex5 <sup>35</sup> ; RINL <sup>35</sup> ; Varp <sup>29, 70</sup>                                                                                                                                                                            | VAMP8 <sup>70</sup>                                                                                                                                                                                                                                                                                                                                                                           | Early endocytosis                                        | Autophagy <sup>70</sup>                                                                                                           |
| Rab22A <sup>31</sup>                                                                                          | TBC1D10B <sup>37, 38</sup> ; TBC1D18 <sup>37, 38, 118</sup> ; RAB3GAP* <sup>118</sup>                                                     | Rabex5 <sup>35</sup> ; RINL <sup>35</sup>                                                                                                                                                                                                                            | TBC1D2B <sup>37</sup> ; Rabenosyn5 <sup>34</sup> ; <u>EAA1</u> <sup>34</sup>                                                                                                                                                                                                                                                                                                                  | <i>Trans</i> Golgi network to endocytosis                | Phagosome maturation (A) <sup>30</sup>                                                                                            |
| Rab23 <sup>31</sup>                                                                                           | EVI5L <sup>37, 38</sup>                                                                                                                   | NI                                                                                                                                                                                                                                                                   | NI                                                                                                                                                                                                                                                                                                                                                                                            | Transport between plasma membrane and endocytosis        | Xenophagy <sup>46</sup> ; Hedgehog signaling <sup>30, 46</sup>                                                                    |
| Rab24 <sup>31</sup>                                                                                           | NI                                                                                                                                        | NI                                                                                                                                                                                                                                                                   | NI                                                                                                                                                                                                                                                                                                                                                                                            | NI                                                       | Autophagy <sup>46, 56, 57</sup> ; Cell division <sup>46</sup>                                                                     |
| Rab27A <sup>31, 32, 46</sup> /B <sup>32</sup>                                                                 | TBC1D10A (A) <sup>37, 38</sup> ; TBC1D10B (A) <sup>37, 38</sup>                                                                           | MADD <sup>35, 46</sup>                                                                                                                                                                                                                                               | Melanophilin <sup>101</sup> (A) <sup>34</sup> ; Mun13-4 (A) <sup>34</sup> ; Rabphilin3 <sup>22</sup> ; Noc2 <sup>22</sup> ; Granuphilin <sup>22</sup> ; Slp2a <sup>34</sup>                                                                                                                                                                                                                   | NI                                                       | Secretory granules <sup>32</sup> ; Melanosome transport <sup>32</sup> ; <u>Bone resorption (A)</u> <sup>32</sup>                  |
| Rab30 <sup>31</sup>                                                                                           | NI                                                                                                                                        | NI                                                                                                                                                                                                                                                                   | p115 <sup>43, 57</sup> ; Bicaudal-D <sup>43, 57</sup> ; GM130 <sup>43</sup> ; Ik2 <sup>43</sup> ; USP6NL <sup>37</sup>                                                                                                                                                                                                                                                                        | NI                                                       | Xenophagy <sup>57</sup>                                                                                                           |
| Rab31 <sup>31</sup>                                                                                           | TBC1D10B <sup>38</sup>                                                                                                                    | GAPVD1 <sup>35</sup> ; RIN1 <sup>35</sup> ; RIN2 <sup>35</sup> ; <u>RIN3</u> <sup>35, 39</sup> ; RINL <sup>35</sup> ; ASL2 <sup>35</sup> ; ALS2CL <sup>35</sup>                                                                                                      | NI                                                                                                                                                                                                                                                                                                                                                                                            | <i>Trans</i> Golgi network to endocytosis                | NI                                                                                                                                |
| Rab32 <sup>31</sup>                                                                                           | RUTBC1 <sup>29, 34, 55</sup>                                                                                                              | HPS1-HPS4 <sup>29, 34, 35</sup>                                                                                                                                                                                                                                      | Varp <sup>35</sup>                                                                                                                                                                                                                                                                                                                                                                            | NI                                                       | Autophagy <sup>46, 55, 64</sup> ; Mitochondrial dynamics <sup>31, 46</sup> ; Melanosome transport <sup>31, 46</sup>               |
| Rab33A <sup>31</sup> /B <sup>31</sup>                                                                         | <u>TBC1D25</u> <sup>38, 40, 69</sup> ; RUTBC1 <sup>34</sup>                                                                               | NI                                                                                                                                                                                                                                                                   | Rab33B-BP <sup>22</sup> ; Rabaptin5 <sup>34</sup> ; Atg16L <sup>68</sup>                                                                                                                                                                                                                                                                                                                      | Intra-Golgi trafficking                                  | Autophagy (B) <sup>46, 55, 57, 68, 69</sup>                                                                                       |
| Rab34 <sup>31</sup>                                                                                           | TBC1D18 <sup>38, 118</sup> ; <u>TBC1D25</u> <sup>38, 40, 118</sup>                                                                        | NI                                                                                                                                                                                                                                                                   | <u>RILP</u> <sup>22, 90</sup>                                                                                                                                                                                                                                                                                                                                                                 | NI                                                       | Macropinocytosis <sup>30</sup> ; Lysosomes distribution <sup>30</sup>                                                             |
| Rab35 <sup>14, 26, 72</sup>                                                                                   | TBC1D10A <sup>37, 38, 58</sup> ; TBC1D10B <sup>37, 38</sup> ; TBC1D20C <sup>37, 38</sup> ; TBC1D17 <sup>37</sup> ; EVI5 <sup>37, 38</sup> | DENND1A <sup>35</sup> ; DENND1B <sup>24, 35</sup> ; DENND1C <sup>35</sup> ; FLNC <sup>35</sup>                                                                                                                                                                       | NI                                                                                                                                                                                                                                                                                                                                                                                            | Recycling endocytosis                                    | Sorting melanosomes <sup>32</sup> ; Phagosome maturation <sup>32</sup> ; T cell recycling <sup>38</sup> ; Mitophagy <sup>58</sup> |
| Rab38 <sup>31, 77</sup>                                                                                       | NI                                                                                                                                        | HPS1-HPS4 <sup>29, 34, 35</sup>                                                                                                                                                                                                                                      | Varp <sup>35</sup>                                                                                                                                                                                                                                                                                                                                                                            | NI                                                       | Melanosome transport <sup>22, 32, 35</sup> ; Secretory granules <sup>22</sup>                                                     |
| Rab44 <sup>78</sup>                                                                                           | NI                                                                                                                                        | NI                                                                                                                                                                                                                                                                   | NI                                                                                                                                                                                                                                                                                                                                                                                            | NI                                                       | NI                                                                                                                                |

Underlined: Expressed or function in OCs; Superscript: Reference; (X): Specific to the isoform; \*Atypical RabGAP without TBC domain; NI: Not identified
